# Supplementary material for: The paradox of NKp46+ natural killer cells: drivers of severe hepatitis C virus-induced pathology but in-vivo resistance to interferon α treatment
Source: PubMed Central journal article supplement — Gut. 2013 May 11;63(3):515–24. doi: 10.1136/gutjnl-2013-304472 (PMC3932740; doi:10.1136/gutjnl-2013-304472), 2013-05-11

**Supplementary Table: Donor Characteristics**

| Patient           | Age | Sex | Genotype/<br>Diagnosis | NI<br>score | Fibrosis<br>score | Viral<br>Load         | ALT | Treatment<br>outcome | FNA | Degranulation<br>assay |
|-------------------|-----|-----|------------------------|-------------|-------------------|-----------------------|-----|----------------------|-----|------------------------|
| <b>HCV donors</b> |     |     |                        |             |                   |                       |     |                      |     |                        |
| <b>G1-01</b>      | 31  | F   | 1a                     | 4           | 1                 | 1.3 x 10 <sup>6</sup> | 78  | Failed               | Yes | Yes                    |
| <b>G1-03</b>      | 57  | F   | 1a                     | 7           | 1                 | 1.7 x 10 <sup>6</sup> | 134 | Failed               | Yes | Yes                    |
| <b>G1-05</b>      | 45  | M   | 1a NASH                | 8           | 5                 | 6.5 x 10 <sup>5</sup> | 110 | Failed               | Yes | Yes                    |
| <b>G1-06</b>      | 36  | F   | 1                      | 4           | 0                 | 1.7 x 10 <sup>6</sup> | 47  | -                    | Yes | -                      |
| <b>G1-08</b>      | 62  | M   | 1b                     | 5           | 1                 | 4.0 x 10 <sup>5</sup> | 147 | -                    | Yes | -                      |
| <b>G1-11</b>      | 42  | M   | 1                      | 4           | 3                 | 7.0 x 10 <sup>5</sup> | 47  | -                    | Yes | Yes                    |
| <b>G1-12</b>      | 43  | F   | 1A                     | 3           | 0                 | 2.3 x 10 <sup>6</sup> | 26  | -                    | Yes | -                      |
| <b>G1-15</b>      | 58  | M   | 1                      | 6           | 5                 | 1.2 x 10 <sup>7</sup> | 47  | -                    | Yes | -                      |
| <b>G1-17</b>      | 52  | M   | 1A                     | 6           | 1                 | 6.6 x 10 <sup>5</sup> | 149 |                      | Yes | Yes                    |
| <b>G1-18</b>      | 62  | F   | 1                      | 5           | 2                 | 6.5 x 10 <sup>5</sup> | 57  | Failed               | Yes | Yes                    |
| <b>G1-19</b>      | 50  | M   | 1                      | 5           | 5                 | 3.0 x 10 <sup>7</sup> | 139 | -                    | Yes | Yes                    |
| <b>G1-21</b>      | 53  | M   | 1                      | 3           | 0                 | 3.6 x 10 <sup>6</sup> | 33  | -                    | Yes | -                      |
| <b>G1-22</b>      | 56  | M   | 1                      | 3           | 6                 | 4.1 x 10 <sup>6</sup> | 90  | -                    | Yes | -                      |
| <b>G1-23</b>      | 37  | F   | 1a NASH                | 6           | 5                 | 24000                 | 318 |                      | Yes | Yes                    |
| <b>G1-24</b>      | 53  | M   | 1                      | 3           | 0                 | 3.6 x 10 <sup>6</sup> | 33  | -                    | Yes | -                      |
| <b>G1-25</b>      | 65  | M   | 1a                     | 4           | 5                 | 3.2 x 10 <sup>6</sup> | 90  | -                    | Yes | -                      |
| <b>G1-41</b>      | 51  | M   | 1 & 3                  | 5           | 1                 | 3.8 x 10 <sup>6</sup> | 38  | Failed               | -   | Yes                    |
| <b>G1-42</b>      | 27  | M   | 1b                     | 5           | 1                 | 6.0 x 10 <sup>6</sup> | 63  | SVR                  | -   | Yes                    |
| <b>G3-01</b>      | 44  | M   | 3                      | -           | -                 | 5.5 x 10 <sup>5</sup> | 66  | SVR                  | -   | Yes                    |
| <b>G3-06</b>      | 42  | F   | 3a                     | 0           | 4                 | 2.0 x 10 <sup>6</sup> | 80  | SVR                  | -   | Yes                    |
| <b>G3-07</b>      | 56  | M   | 3a                     | 6           | 6                 | 2.3 x 10 <sup>6</sup> | 35  | SVR                  | Yes | Yes                    |
| <b>G3-08</b>      | 41  | M   | 3a                     | 2           | 1                 | 4.4 x 10 <sup>5</sup> | 87  | -                    | Yes | -                      |
| <b>G3-09</b>      | 36  | M   | 3a                     | 6           | 2                 | 2.4 x 10 <sup>6</sup> | 332 | SVR                  | Yes | Yes                    |
| <b>G3-10</b>      | 27  | M   | 3                      | 7           | 1                 | 3100                  | 29  | SVR                  | Yes | Yes                    |
| <b>G3-11</b>      | 59  | M   | 3                      | ND          | ND                | -                     | 51  | -                    | Yes | -                      |
| <b>G3-12</b>      | 49  | M   | 3                      | 3           | 2                 | 1.6 x 10 <sup>5</sup> | 174 | -                    | Yes | -                      |
| <b>G3-13</b>      | 54  | M   | 3                      | 6           | 3                 | 1900                  | 179 | -                    | Yes | -                      |
| <b>G3-14</b>      | 52  | M   | 3                      | 5           | 5                 | 2.4 x 10 <sup>5</sup> | 90  | -                    | Yes | Yes                    |
| <b>G3-40</b>      | 58  | M   | 3                      | 4           | 6                 | 3.1 x 10 <sup>5</sup> | 53  | Failed               | -   | Yes                    |
| <b>G3-41</b>      | 47  | M   | 3                      | -           | -                 | 4.7 x 10 <sup>6</sup> | 169 | SVR                  | -   | Yes                    |
| <b>G3-42</b>      | 39  | M   | 3                      | 5           | 2                 | 1.6 x 10 <sup>6</sup> | 136 | SVR                  | -   | Yes                    |
| <b>G3-43</b>      | 53  | M   | 3                      | ND          | ND                | 3.9 x 10 <sup>5</sup> | 26  | SVR                  | -   | Yes                    |
| <b>G3-44</b>      | 67  | F   | 3                      | 3           | 1                 | 2.2 x 10 <sup>5</sup> | 174 | SVR                  | -   | Yes                    |
| <b>G4-01</b>      | 29  | F   | 4                      | ND          | ND                | 6.2 x 10 <sup>5</sup> | 38  | Failed               | -   | Yes                    |
| <b>G5-01</b>      | 46  | F   | 5                      | ND          | ND                | 7.6 x 10 <sup>6</sup> | 52  | SVR                  | -   | Yes                    |

### Chronic Liver Disease controls

| Patient | Age | Sex | Genotype/<br>Diagnosis      | NI<br>score | Fibrosis<br>score | Viral<br>Load | ALT | Treatment<br>outcome | FNA | Degranulation<br>assay |
|---------|-----|-----|-----------------------------|-------------|-------------------|---------------|-----|----------------------|-----|------------------------|
| DD03    | 61  | F   | Deranged<br>LFTs? Cause     | 0           | 0                 |               | 89  |                      | Yes |                        |
| DD12    | 40  | F   | PBC                         | 0           | 1                 |               | 72  |                      | Yes |                        |
| DD13    | 49  | F   | NASH                        | 0           | 5-6               |               | 25  |                      | Yes |                        |
| DD14    | 67  | F   | NASH                        | 1           | 3-4               |               | 81  |                      | Yes |                        |
| DD15    | 52  | F   | Steatosis                   | 0           | 1                 |               | 53  |                      | Yes |                        |
| DD16    | 40  | M   | MTX use -<br>NAD            | 0           | 0                 |               | 17  |                      | Yes |                        |
| DD18    | 58  | F   | NASH                        | 6-7         | 5-6               |               | 57  |                      | Yes | Yes                    |
| DD19    | 38  | M   | Steatosis                   | 0           | 0                 |               | 55  |                      | Yes | Yes                    |
| DD20    | 46  | M   | ALD HHC                     | 1           | 1                 |               | 73  |                      | Yes | Yes                    |
| DD21    | 69  | M   | Granulomat<br>ous hepatitis | ND          | ND                |               | 39  |                      | Yes |                        |
| DD22    | 53  | M   | ALD                         | 0           | 0                 |               | 34  |                      | Yes |                        |
| DD23    | 43  | M   | Steatosis                   | 2           | 0                 |               | 96  |                      | Yes | Yes                    |
| DD24    | 55  | M   | ALD HHC                     | 2           | 5-6               |               | 46  |                      | Yes |                        |
| DD25    | 29  | M   | NASH                        | 1           | 3                 |               | 122 |                      | Yes | Yes                    |
| DD28    | 58  | M   | ALD HHC                     | 2           | 5-6               |               | 39  |                      | Yes | Yes                    |
| DD29    | 55  | F   | PBC                         | 2           | 3-4               |               | 59  |                      | Yes | Yes                    |
| DD30    | 42  | F   | PBC                         | 2           | 3-4               |               | 179 |                      | Yes | Yes                    |
| DD32    | 55  | M   | HHC                         | 1           | 4                 |               | 23  |                      | Yes | Yes                    |
| DD33    | 55  | M   | PSC                         | 2           | 1                 |               | 54  |                      | Yes | Yes                    |
| DD34    | 51  | F   | PBC                         | 2           | 5                 |               | 151 |                      | Yes |                        |
| DD35    | 29  | M   | Wilson's                    |             |                   |               | 31  |                      | Yes |                        |
| DD36    | 58  | M   | Previous<br>MTX /NASH       |             |                   |               | 64  |                      | Yes |                        |

ALD- Alcoholic liver disease, HHC- hereditary haemochromatosis, NASH - Non alcoholic steatohepatitis, PBC- Primary biliary cirrhosis, MTX- methotrexate, LFTs - Liver function tests, SVR - Sustained Viraemic Response, PSC- Primary Sclerosing Cholangitis, NAD - no abnormality detected, ND - not done

**Supplementary figure 1: NK gating strategy**

A) Lymphocytes are gated from the forward and side scatter plot. B) Single cells gate. C) Live /dead gate. D) CD56<sup>+</sup> CD3, CD14 & CD19<sup>-</sup> NK cells.

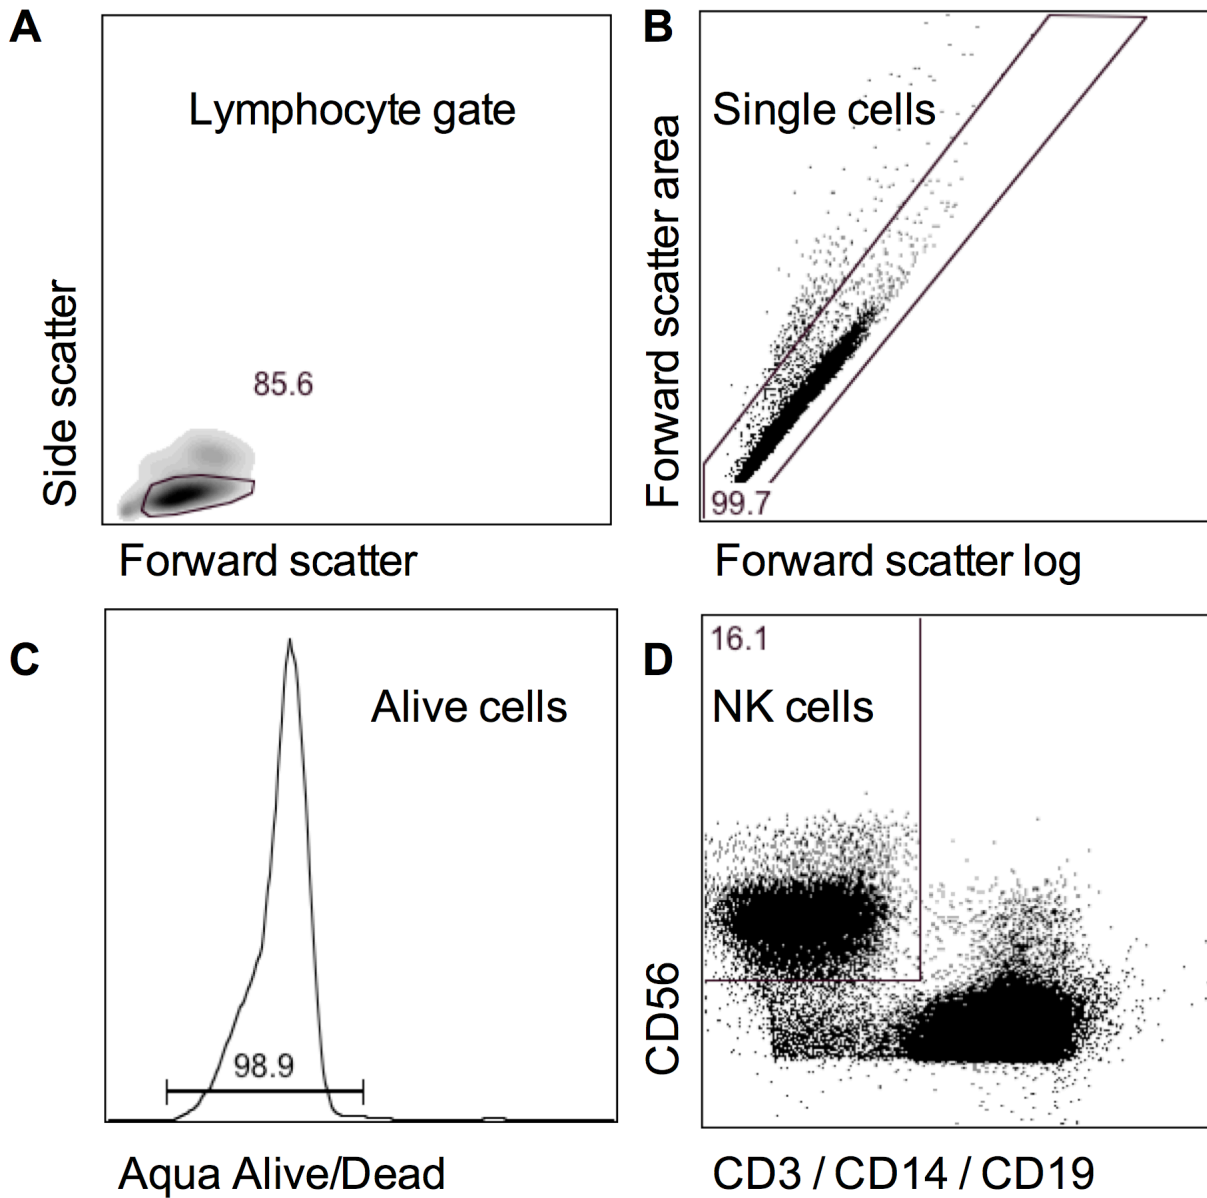

## Supplementary figure 2 Expression of NK activating receptor ligands on target cell lines

A) Huh7.5 targets cells Representative FACS histograms demonstrating NKp30-Fc, NKp46-Fc, MICA, MICB and UBLP2 staining (solid grey = isotype control, black line = ligand of interest).

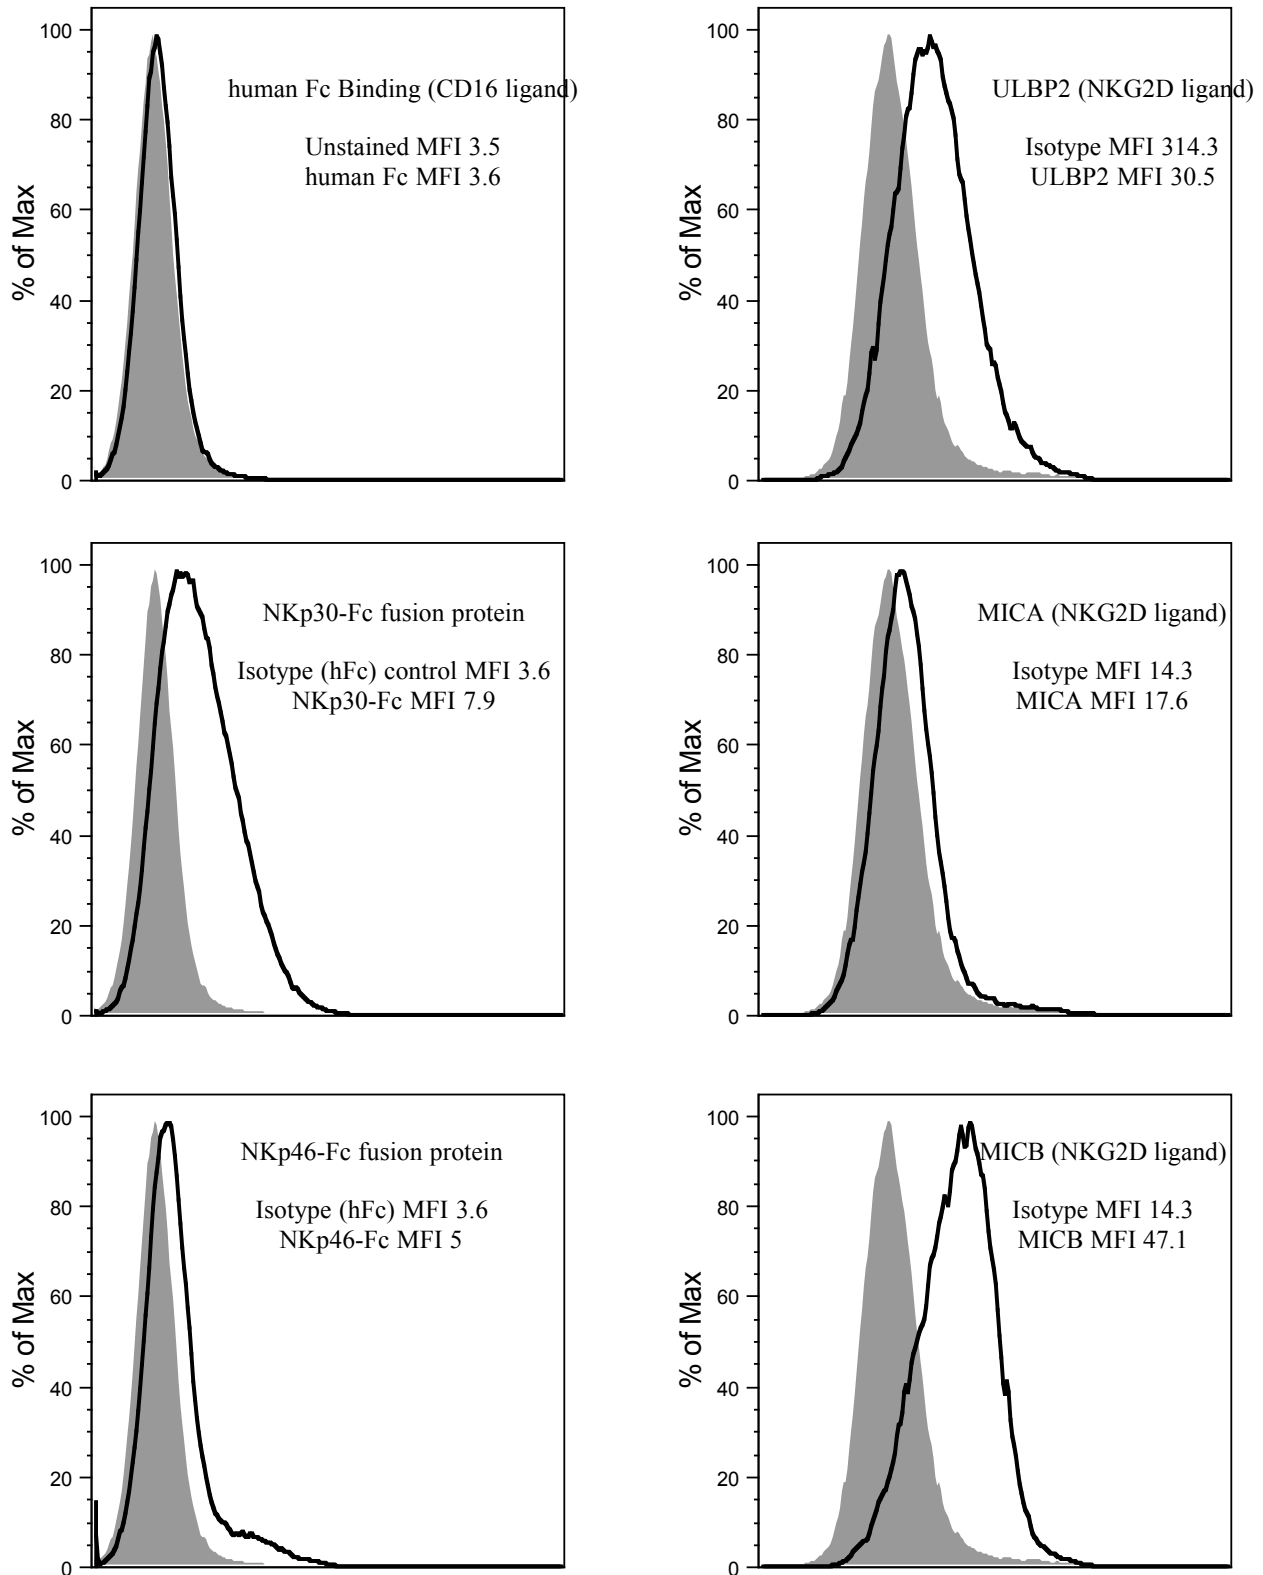

**B) K562 targets cells** Representative FACS histograms demonstrating NKp30-Fc, NKp46-Fc, MICA, MICB and UBLP2 staining (solid grey = isotype control, black line = ligand of interest).

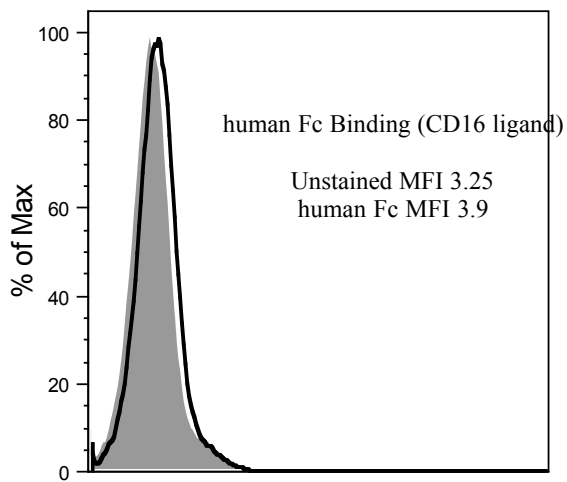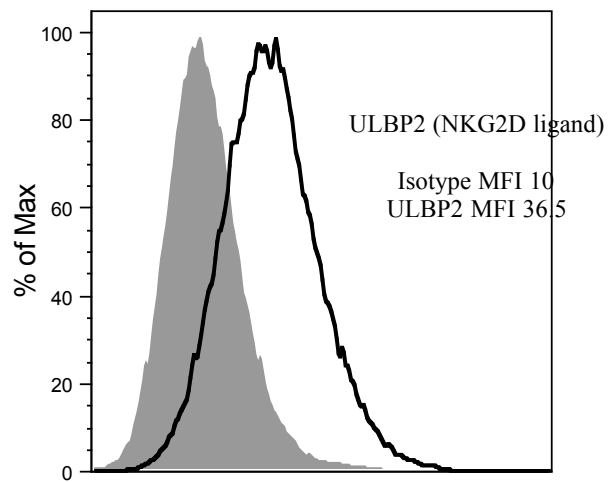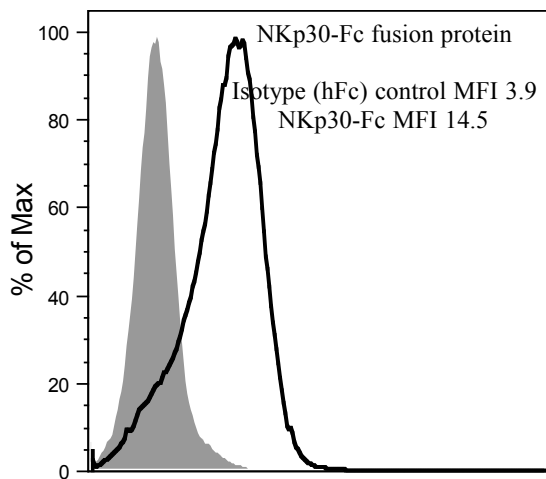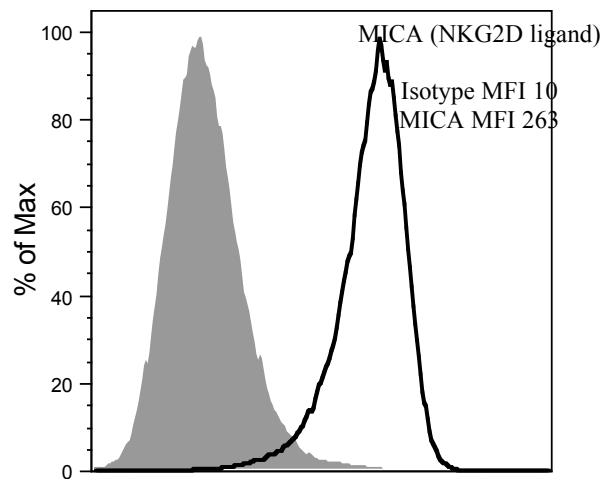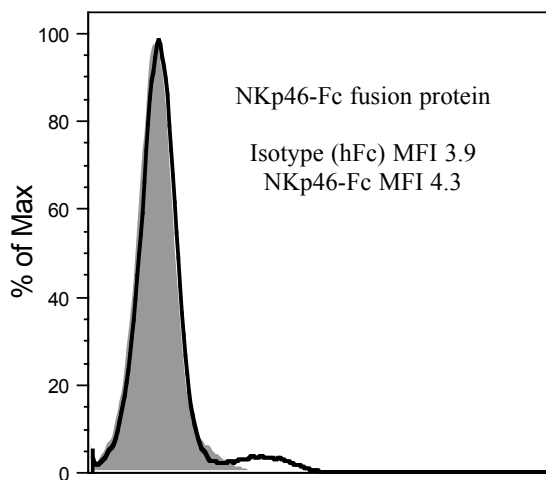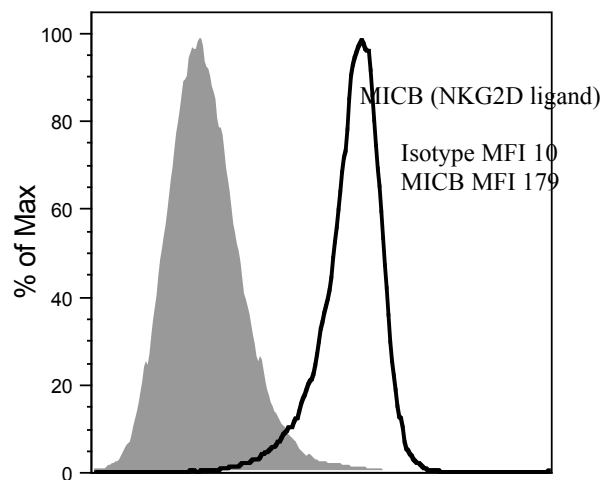

**Supplementary figure 3: Alterations in peripheral blood NK activating receptors on**

**degranulation.** A) Representative FACS plots of CD16 expression on resting NK (left panel) and degranulating NK cells as demonstrated by CD107a externalization (right panel). B) FACS plots demonstrating NKp30 down regulation on degranulating NK cells. C) FACS plots demonstrating NKp46 down regulation on degranulating NK cells. D) FACS plots demonstrating NKG2D down regulation on degranulating NK cells.

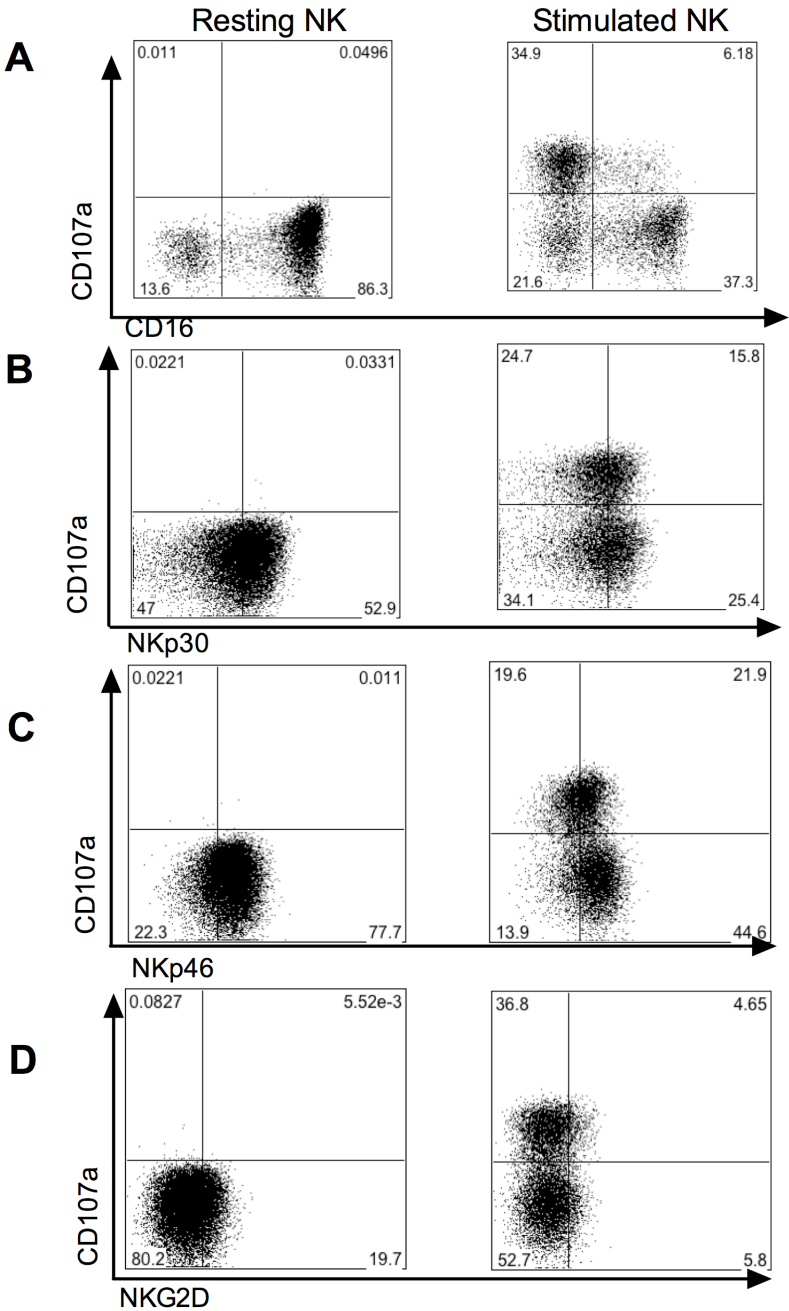

**Supplementary figure 4: Intrahepatic NKp46<sup>+</sup> cells fall into two clusters.** A) Analysis of NKp46<sup>+</sup> cells demonstrated that individuals fell into two clusters either >80% or <70%. There was a marked paucity of individuals who fell between these 2 groups. B) Representative FACS plots demonstrating NKp46 expression for FMO (solid gray), FNA (thick line) and peripheral blood NK cells (thin line) of a NKp46-poor subject (left panel) and a NKp46-rich subject (right panel)

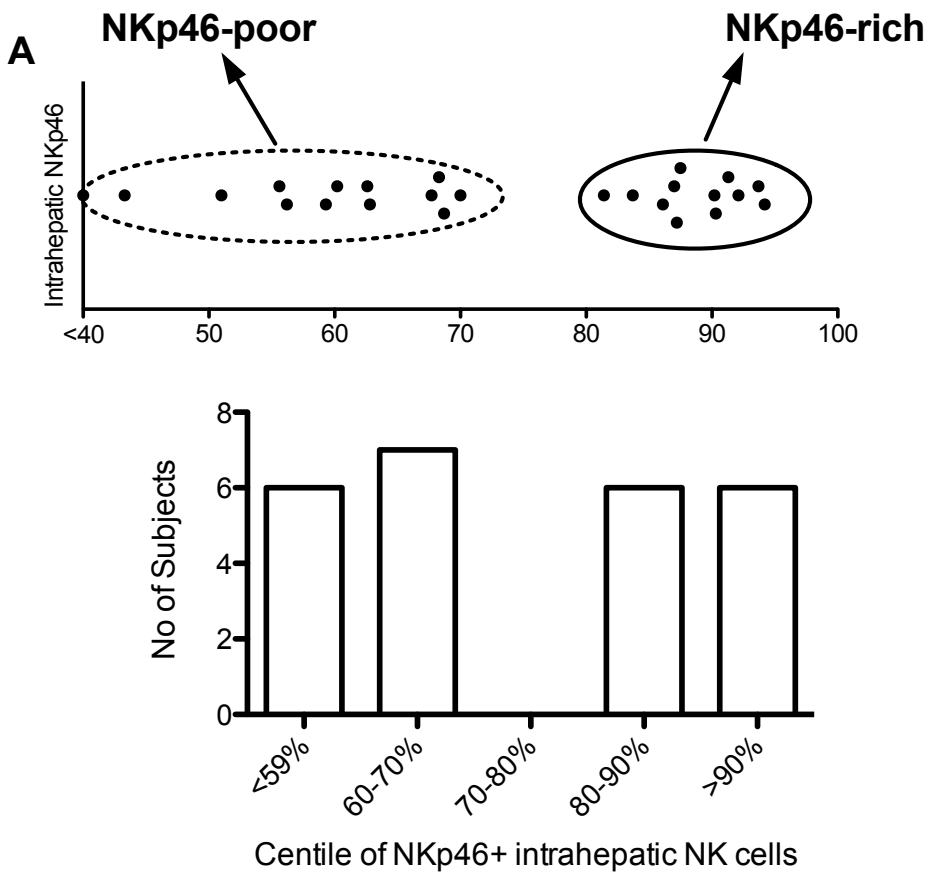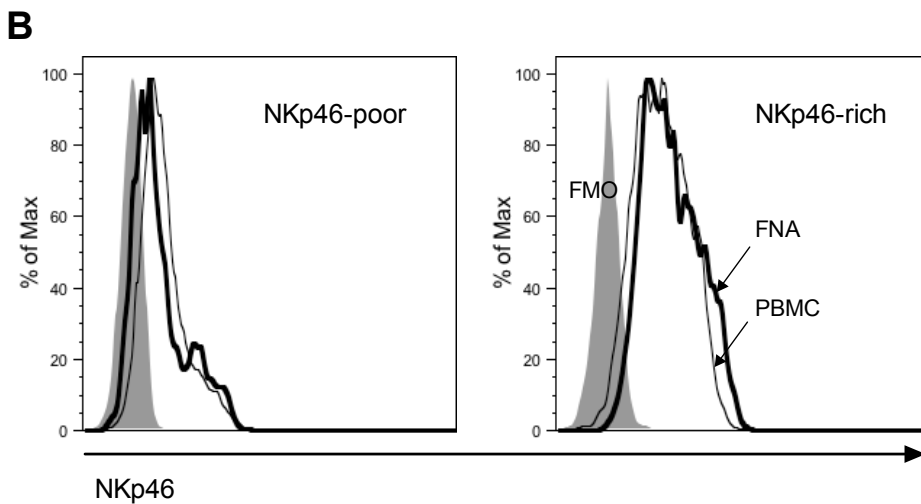

**Supplementary figure 5: Functional ratio.** Representative pre-treatment peripheral blood FACS plots demonstrating relative increase in CD107a externalisation in response to increasing stimulation from weak stimulation (50 IU/ml IFN $\alpha$  and huh7.5 target cells) and high stimulation (1000 IU/ml and K562 target cells) for an individual with slow viral clearance who failed treatment and a patient with rapid viral clearance who achieved SVR. NK responsiveness = %CD107a+ strong stimulation/ %CD107a+ weak stimulation.

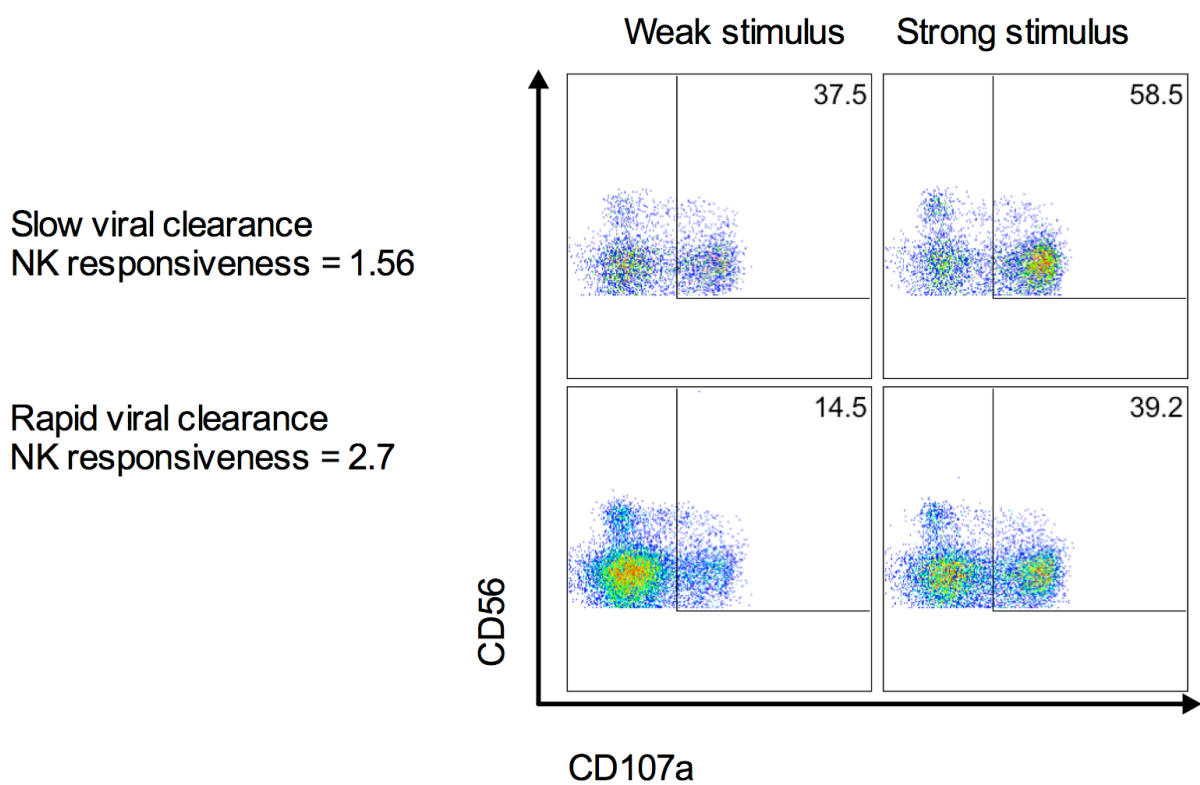



**Supplementary Figure 6 A: NKp46 MFI.** Representative figures demonstrating NKp46 expression based on MFI. Whilst it was possible to distinguish NKp46<sup>High</sup> and NKp46<sup>Low</sup> populations in some subjects (right panel) in 40% of individuals there was a single population of NKp46<sup>+</sup> cells (left panel).

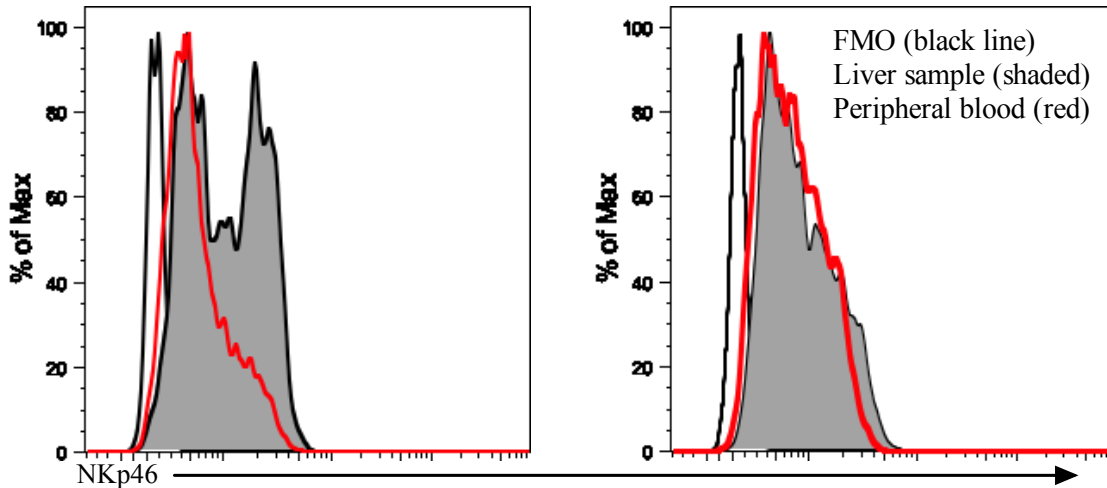

**B: NKp46 expression measured by MFI and %NKp46.** NKp46 expression measured by MFI correlates strongly with expression measured as % NKp46<sup>+</sup>

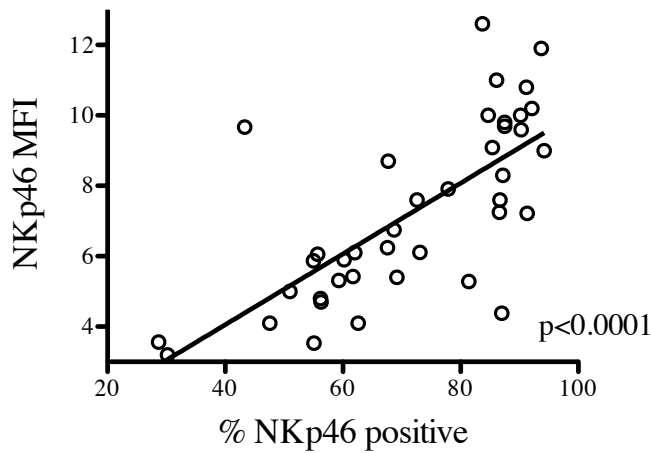

Supplement: gutjnl-2013-304472-s1.pdf [file gutjnl-2013-304472-s1.pdf]
